# Supplementary material
Source: PubMed Central journal article supplement (PMC4349140)
Supplement: supp_kfu265_toxsci-14-0748-File012.pdf [file supp_kfu265_toxsci-14-0748-File012.pdf]

# **Pulmonary Effects of Ag NP Size, Coating, and Dose over Time upon Intratracheal Instillation**

Rona M. Silva<sup>\*</sup>, Donald S. Anderson<sup>\*</sup>, Lisa M. Franz<sup>†</sup>,  
Janice L. Peake<sup>\*</sup>, Patricia C. Edwards<sup>\*</sup>, Laura S. Van  
Winkle<sup>\*</sup> and Kent Pinkerton<sup>\*‡</sup>

<sup>\*</sup>Center for Health and the Environment, University  
of California Davis, CA 95616. Email:  
lusilva@ucdavis.edu, dsanderson@ucdavis.edu,  
jlpeake@ucdavis.edu, pcedwards@ucdavis.edu,  
lsvanwinkle@ucdavis.edu

<sup>†</sup>Department of Pulmonary Medicine, School of  
Medicine, University of California Davis, CA 95616.  
Email: lisa.franzi@ucdmc.ucdavis.edu

<sup>‡</sup>Correspondence: Dr. Kent Pinkerton, Center for  
Health and the Environment, University of California,  
One Shields Avenue, Davis, CA 95616. Tel: (530) 752-  
8334. Fax: (530) 752-5300. Email:  
kepinkerton@ucdavis.edu

Running title: Health effects of silver nanoparticle  
instillation

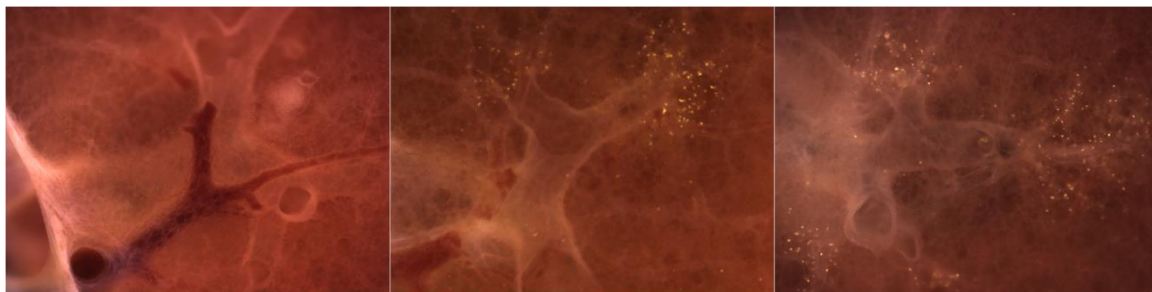

**Supplemental Figure S1.** At Day 1 post IT, Ag NPs were observed in the terminal bronchioles and surrounding parenchyma. Panels are Brightfield microscopy images of terminal bronchioles in whole lung mounts. Animals were exposed to sham control (left), citrate-coated Ag NPs (middle), or PVP-coated Ag NPs (right).
